# Supplementary material for: Substrate-selective inhibitors that reprogram the activity of insulin-degrading enzyme
Source: Springer Nature journal article supplement (doi:10.1038/s41589-019-0271-0), 2019-05-13
Supplement: 41589_2019_271_MOESM159_ESM.mol [file 41589_2019_271_MOESM159_ESM.mol]

nchembio.A180507627C-comp68.mol
  ChemDraw03011913212D

 49 54  0  0  1  0  0  0  0  0999 V2000
    2.3933   -2.2559    0.0000 C   0  0  0  0  0  0  0  0  0  0  0  0
    1.5964   -2.4693    0.0000 C   0  0  0  0  0  0  0  0  0  0  0  0
    1.0122   -1.8859    0.0000 C   0  0  0  0  0  0  0  0  0  0  0  0
    1.2264   -1.0890    0.0000 C   0  0  0  0  0  0  0  0  0  0  0  0
    2.0233   -0.8755    0.0000 C   0  0  0  0  0  0  0  0  0  0  0  0
    2.6067   -1.4590    0.0000 C   0  0  0  0  0  0  0  0  0  0  0  0
    0.6422   -0.5048    0.0000 C   0  0  0  0  0  0  0  0  0  0  0  0
    0.6422    0.3199    0.0000 C   0  0  0  0  0  0  0  0  0  0  0  0
    1.2264    0.9033    0.0000 C   0  0  0  0  0  0  0  0  0  0  0  0
   -0.1831    0.3199    0.0000 N   0  0  0  0  0  0  0  0  0  0  0  0
   -0.7666    0.9033    0.0000 C   0  0  0  0  0  0  0  0  0  0  0  0
   -2.1754   -0.5048    0.0000 C   0  0  0  0  0  0  0  0  0  0  0  0
   -1.5920   -1.0890    0.0000 N   0  0  0  0  0  0  0  0  0  0  0  0
   -0.7666   -1.0890    0.0000 C   0  0  0  0  0  0  0  0  0  0  0  0
   -0.1831   -0.5048    0.0000 C   0  0  0  0  0  0  0  0  0  0  0  0
   -1.9079   -1.8517    0.0000 S   0  0  0  0  0  0  0  0  0  0  0  0
   -2.6706   -1.5358    0.0000 O   0  0  0  0  0  0  0  0  0  0  0  0
   -1.1451   -2.1669    0.0000 O   0  0  0  0  0  0  0  0  0  0  0  0
    2.9767   -2.8400    0.0000 Br  0  0  0  0  0  0  0  0  0  0  0  0
   -1.6482   -3.4847    0.0000 N   0  0  0  0  0  0  0  0  0  0  0  0
   -2.1669   -2.6365    0.0000 C   0  0  0  0  0  0  0  0  0  0  0  0
   -3.1324   -2.8685    0.0000 N   0  0  0  0  0  0  0  0  0  0  0  0
   -3.2093   -3.8539    0.0000 C   0  0  0  0  0  0  0  0  0  0  0  0
   -2.2935   -4.2382    0.0000 C   0  0  0  0  0  0  0  0  0  0  0  0
   -0.6577   -3.5636    0.0000 C   0  0  0  0  0  0  0  0  0  0  0  0
   -1.5638    0.6897    0.0000 C   0  0  0  0  0  0  0  0  0  0  0  0
   -2.1475    1.2733    0.0000 C   0  0  0  0  0  0  0  0  0  0  0  0
   -2.9728   -0.7179    0.0000 C   0  0  0  0  0  0  0  0  0  0  0  0
   -3.5561   -0.1340    0.0000 C   0  0  0  0  0  0  0  0  0  0  0  0
    1.0145    1.6981    0.0000 O   0  0  0  0  0  0  0  0  0  0  0  0
    1.5969    2.2790    0.0000 C   0  0  0  0  0  0  0  0  0  0  0  0
    2.1778    1.6966    0.0000 C   0  0  0  0  0  0  0  0  0  0  0  0
    2.9727    1.9085    0.0000 C   0  0  0  0  0  0  0  0  0  0  0  0
    3.5536    1.3261    0.0000 C   0  0  0  0  0  0  0  0  0  0  0  0
    3.3396    0.5318    0.0000 C   0  0  0  0  0  0  0  0  0  0  0  0
    2.5448    0.3199    0.0000 C   0  0  0  0  0  0  0  0  0  0  0  0
    1.9639    0.9023    0.0000 C   0  0  0  0  0  0  0  0  0  0  0  0
    1.0160    2.8615    0.0000 C   0  0  0  0  0  0  0  0  0  0  0  0
    0.2212    2.6496    0.0000 C   0  0  0  0  0  0  0  0  0  0  0  0
   -0.3597    3.2320    0.0000 C   0  0  0  0  0  0  0  0  0  0  0  0
   -0.1458    4.0263    0.0000 C   0  0  0  0  0  0  0  0  0  0  0  0
    0.6491    4.2382    0.0000 C   0  0  0  0  0  0  0  0  0  0  0  0
    1.2300    3.6557    0.0000 C   0  0  0  0  0  0  0  0  0  0  0  0
    2.1794    2.8599    0.0000 C   0  0  0  0  0  0  0  0  0  0  0  0
    1.9675    3.6548    0.0000 C   0  0  0  0  0  0  0  0  0  0  0  0
    2.5499    4.2357    0.0000 C   0  0  0  0  0  0  0  0  0  0  0  0
    3.3442    4.0217    0.0000 C   0  0  0  0  0  0  0  0  0  0  0  0
    3.5561    3.2269    0.0000 C   0  0  0  0  0  0  0  0  0  0  0  0
    2.9736    2.6460    0.0000 C   0  0  0  0  0  0  0  0  0  0  0  0
  1  2  1  0      
  2  3  2  0      
  3  4  1  0      
  4  5  2  0      
  5  6  1  0      
  1  6  2  0      
  7  4  1  1      
  7  8  1  0      
  8  9  1  6      
  9 30  1  0      
  8 10  1  0      
 10 11  1  0      
 12 13  1  0      
 13 14  1  0      
 15 14  1  6      
  7 15  1  0      
 10 15  1  0      
 13 16  1  0      
 16 17  2  0      
 16 18  2  0      
 16 21  1  0      
  1 19  1  0      
 20 21  1  0      
 21 22  2  0      
 22 23  1  0      
 23 24  2  0      
 20 24  1  0      
 20 25  1  0      
 11 26  1  0      
 26 27  2  0      
 12 28  1  0      
 28 29  2  0      
 48 49  2  0      
 47 48  1  0      
 46 47  2  0      
 45 46  1  0      
 44 49  1  0      
 44 45  2  0      
 42 43  2  0      
 41 42  1  0      
 40 41  2  0      
 39 40  1  0      
 38 43  1  0      
 38 39  2  0      
 36 37  2  0      
 35 36  1  0      
 34 35  2  0      
 33 34  1  0      
 32 37  1  0      
 32 33  2  0      
 31 44  1  0      
 31 38  1  0      
 31 32  1  0      
 30 31  1  0      
M  END
